# Supplementary material
Source: PubMed Central journal article supplement (PMC5924426)

## 1 **SUPPLEMENTARY METHODS**

### 2 **Antibodies and flow cytometry**

3 For surface staining, cells were stained at 4 °C in the presence of Fc Block (2.4G2; BD  
4 Biosciences) in flow cytometry buffer (DPBS plus 2% FCS). After staining surface markers,  
5 cells were fixed and permeabilized for intracellular cytokine and transcription factor staining  
6 according to the manufacturer's instructions (BD Biosciences). Antibodies used for surface  
7 and intracellular staining were listed in the supplementary Table 2.

8

### 9 **T cell lentiviral transduction**

10 The lentiviral vector Gata3-shRNA and scramble-shRNA were purchased from Sigma.  
11 Lentivirus was produced in HEK293T cells. CD4<sup>+</sup> T cells were stimulated for 24 h with  
12 plate-bound anti-CD3 Ab (0.5 µg/ml) and then transduced with virus-containing medium  
13 supplemented with polybrene (8 µg/ml). 20 hours later, culture medium was replaced with  
14 complete medium with anti-CD3 Ab (0.5 µg/ml) for 2 days, rested for 2 days and then  
15 stimulated with PMA and Ionomycin for 4 hours for intracellular staining.

16

### 17 **T cell stimulation**

18 Mouse CD4<sup>+</sup> T cells were negatively purified and activated by plate-coated anti-CD3 (1  
19 µg/ml) and anti-CD28 (1 µg/ml) Abs for 72 h in complete cell medium (RPMI1640)  
20 supplemented with 10% heat-inactivated FBS, 2 mM glutamine, penicillin-streptomycin,  
21 nonessential amino acids, sodium pyruvate, 10 mM HEPES and 50 µM 2-mercaptoethanol,  
22 then expanded for another 3 day in fresh medium containing 1 ng/ml recombinant mouse  
23 IL-2. In some experiments, cells cultured for 3 days and supernatants were collected for  
24 measuring cytokines by ELISA assay.

25

26 For isolation of infiltrating cells from lungs, lungs were minced and digested in 5 ml of  
27 RPMI1640 media plus 10% FBS with 250 µg/ml collagenase IV (Roche) and 30 U/ml DNase  
28 I (Sigma-Aldrich) for 60 min at 37 °C with shaking. Cells were passed through a 70-µm  
29 strainer and spin down. The cell pellet was resuspended in 40% Percoll, carefully layered  
30 onto 80% Percoll and centrifuged at 650 g, without brake, RT for 30 min, then collected the

31 layer in the interface between the two Percoll concentrations. Cells were washed with PBS  
32 before red blood cells were lysed with ACK lysis buffer. Cells were counted and  $2 \times 10^6$  cells  
33 were activated with PMA and ionomycin for analysis of intracellular cytokines and surface  
34 markers by flow cytometry.

35

### 36 **Tet-On System**

37 Wild-type or mutant MCPIP1 (D141N, C306R, D225/226A) expressing CEM Tet-on cells  
38 were generated as described previously<sup>1</sup>. The cells were cultured for 24 hours with Dox (100  
39 ng/ml) and then treated with PMA (10 ng/ml) and Ionomycin (0.5  $\mu$ g/ml) for 4 hours. Total  
40 RNA was isolated and used to measure gene expression. For western blot, CEM Tet-On cells  
41 were treated with Dox (100 ng/ml) for 48 h and then lysed.

42

### 43 **Luciferase assay**

44 CEM-Tet-on cells were transfected with luciferase reporter plasmid containing the 3' UTR  
45 of Gata3<sup>2</sup> using Nucleofector (Lonza). MCPIP1 expression was induced by Dox (100 ng/ml).  
46 Cells were lysed after 24 hours and luciferase activity in lysates was determined with  
47 Dual-Luciferase Reporter Assay system (Promega).

48

### 49 **Quantitative RT-PCR**

50 Quantitative PCR was performed with SYBR green (Invitrogen, Life Technologies) using  
51 an Applied Biosystems StepOne PCR system. Results were analyzed with  $\Delta\Delta$ CT method  
52 with glyceraldehyde-3-phosphate dehydrogenase (GAPDH) as an endogenous reference  
53 control. Primer sequences are listed in supplementary table1.

54

### 55 **ELISA**

56 Cell culture supernatants were assayed by ELISA for mouse IL-4, IFN- $\gamma$  (BD Biosciences),  
57 IL-5 and IL-13 (eBioscience), according to the manufacturers' instructions.

58

### 59 **RNA Immunoprecipitation**

60 Th2-polarized cell lysates were prepared from WT mice after 6 d of *in vitro* polarization.  
61 Cell lysates were prepared in NT-2 buffer (50 mmol/L Tris-HCl, pH 7.4, 150 mmol/L NaCl,

62 1 mmol/L MgCl<sub>2</sub> and 0.05% NP-40) supplemented with 1 mmol/L dithiothreitol, 0.25 U/mL  
63 RNase out and 1× protease inhibitor and incubated on ice for 10 min. Cell lysates were  
64 obtained after high-speed centrifugation at 15,000 g for 15 min. Equal amounts of lysates  
65 were used for immunoprecipitation with MCPIP1 antibody and IgG1 control. Anti-MCPIP1  
66 Ab or IgG1 were pre-coated onto protein A Sepharose beads and incubated with cell lysates.  
67 Protein A Sepharose beads were then washed with NT-2 buffer and incubated with 20 U  
68 RNase-free DNase I (15 min, 30°C) and further incubated in 100 μL NT-2 buffer containing  
69 0.1% SDS and 0.5 mg/mL proteinase K (30 min, 55°C). The total RNAs were isolated by  
70 adding Trizol reagent (Invitrogen) to the beads and quantitative PCR (qPCR) was performed  
71 to measure GAPDH and GATA3.

72

### 73 **Histological analysis**

74 Peribronchiolar and perivascular inflammation were determined by a semiquantitatively  
75 graded scale as follows: 0, no inflammation; 1, mild inflammation; 2, moderate inflammation;  
76 3, severe inflammation. Goblet-cell hyperplasia was assessed as follows: 0, no or rare PAS<sup>+</sup>  
77 cells; 1, <10% PAS<sup>+</sup> cells observed at a magnification of ×10; 2, 10–25% PAS<sup>+</sup> cells  
78 observed at a magnification of ×10; and 3, >25% PAS<sup>+</sup> cells observed at a magnification of  
79 ×4. A composite score was determined by multiplication of the graded score and the  
80 frequency of airways or vessels with a given pathological finding. All slides were examined  
81 in a random order and scored by a blinded pathologist.

82

### 83 **References**

- 84 1. Liu S, Qiu C, Miao R, et al. MCPIP1 restricts HIV infection and is rapidly degraded in  
85 activated CD4<sup>+</sup> T cells. *Proc Natl Acad Sci U S A*. Nov 19 2013;110(47):19083-19088.
- 86 2. Yang Y, Ahn YH, Gibbons DL, et al. The Notch ligand Jagged2 promotes lung  
87 adenocarcinoma metastasis through a miR-200-dependent pathway in mice. *J Clin Invest*.  
88 Apr 2011;121(4):1373-1385.

89

90 **FIGURE LEGENDS**

91 **Fig E1.** Cell subsets in BAL of *zc3h12a*<sup>-/-</sup> mice. Total number of cells in the BAL of WT and  
92 *Zc3h12a*<sup>-/-</sup> mice were counted and summarized (3-4 mice per group). \*: *p* < 0.05.

93

94 **Fig E2.** Effector CD4 T cells are increased in spleen of *zc3h12a*<sup>-/-</sup> mice. **(A)** The expression  
95 of CD62L and CD44 in CD4<sup>+</sup> T cells of WT and *zc3h12a*<sup>-/-</sup> mice were measured by flow  
96 cytometry and summarized (n=3). **(B)** Percentages of CD8 and CD4 T cells in spleens of  
97 *zc3h12a*<sup>-/-</sup> mice and WT littermates were gated on CD3 (n=3). **(C)** The levels of IL-5 and  
98 IL-13 in culture supernatants of splenic CD4<sup>+</sup> T cells were measured by ELISA after  
99 stimulation with anti-CD3/CD28 Abs (1 μg/ml) for different times (n=3). **(D)** Splenic cells  
100 were stimulated with P/I for 4 h and the percentages of IL-5<sup>+</sup> and IFN-γ<sup>+</sup> CD4 cells were  
101 measured by flow cytometry gated on CD44<sup>+</sup> (n=4). \*: *p* < 0.05, \*\*: *p* < 0.01, \*\*\*: *p* < 0.001.

102

103 **Fig E3.** Gene expression profiles of *zc3h12a*<sup>-/-</sup> CD4 T cells. The mRNA levels of Th2-related  
104 genes were measured by qRT-PCR in naïve WT littermate and *zc3h12a*<sup>-/-</sup> CD4 T cells  
105 stimulated with anti-CD3/CD28 Abs for 3 days (n=3). \*: *p* < 0.05, \*\*: *p* < 0.01, \*\*\*: *p* < 0.001.

106

107 **Fig E4.** IL-5 and IL-13 expression depend on MCPIP1 in CD4 T cells. **(A-C)** WT littermate  
108 and *zc3h12a*<sup>-/-</sup> CD4<sup>+</sup> T cells were pretreated with or without Malt1-specific inhibitor MI-2 (1  
109 μM) for 30 min and then stimulated with anti-CD3/CD28 Abs for 4 hrs. The mRNA  
110 expression of cytokines was measured by qRT-PCR (n=3). \*: *p* < 0.05, \*\*: *p* < 0.01.

111

112 **Fig E5.** Notch signal is required for the initiation of IL-5-producing Th2 cells mediated by  
113 MCPIP1. **(A)** The percentages of Gata3<sup>+</sup>*zc3h12a*<sup>-/-</sup> CD4<sup>+</sup>T cells were analyzed after  
114 pretreatment with GSI and then with anti-CD3/CD28 Abs (n=3). **(B)** Total CD4<sup>+</sup> T cells of  
115 WT and *zc3h12a*<sup>-/-</sup> were pretreated with GSI and then cultured with anti-CD3/CD28 Abs.  
116 Cytokine-producing cells were gated on CD4 and summarized (n=3). \*: *p* < 0.05, \*\*: *p* < 0.01,  
117 \*\*\*: *p* < 0.001.

118

119 **Fig E6.** MCPIP1 inhibits the expression of Th2-associated transcription factors. **(A)** The

120 percentages of  $Gata3^{+}Zc3h12a^{-/-}$   $CD4^{+}$  as in Fig. 6C were summarized from three  
121 independent experiments. **(B)** The expression of GFP/MCPIP1 fusion protein in  
122 CEM-Tet-On cells after adding Dox. **(C)** CEM-Tet-On cells were treated with Dox and P/I,  
123 followed by measuring Gata3 and IL-13 mRNA expression by qRT-PCR (n=3). **(D)**  $CD4^{+}$  T  
124 cells from WT and  $zc3h12a^{-/-}$  mice were stimulated with anti-CD3/CD28 Abs and ActD/DRB.  
125 Then total RNAs were harvested for measuring mRNA levels by qRT-PCR. **(E)** The levels of  
126 Gata3 and MCPIP1 mRNA in WT  $CD4^{+}$  Th2 cells were measured by qRT-PCR. **(F)**  
127 Cytoplasmic extracts were collected from the Th2 cells and immunoprecipitated with  
128 anti-MCPIP1 or isotype matched Ab, followed by RNA extraction. Gata3 mRNA was  
129 detected by PCR (n=3). **(G)** A schematic diagram for putative functional conserved domains  
130 of MCPIP1. **(H)** The expression of Gata3 mRNA in CEM Tet-On cells after adding Dox and  
131 stimulating with P/I for 3 h (n=3). **(I)** The MFI of Gata3 in CEM-Tet-On cells after adding  
132 Dox and then stimulating with P/I. **(J)** Stable CEM-Tet-On cells were treated with Dox and  
133 P/I, and then treated with ActD and DRB for different times. The remaining Gata3 mRNA  
134 was measured by qRT-PCR (n=3). \*:  $p < 0.05$ , \*\*:  $p < 0.01$ , \*\*\*:  $p < 0.001$ .

135

136 **Fig E7.** MCPIP1 deficiency enhances Th2 cell-mediated disease in an allergen-induced  
137 asthma model. WT and  $zc3h12a^{-/-}$  mice were sensitized and challenged with OVA as in Fig.  
138 7A. H&E and PAS staining of lung tissue sections were examined on day 26 **(A)** and  
139 inflammation was scored **(B)** (n=3). **(C)** The percentages of  $CD44^{high}$  cells were gated on  
140  $CD4^{+}$  T cells in spleens of the mice as in (A) and summarized (n=3). **(D)** Splenocytes from  
141 the mice in (A) were stimulated with P/I and the percentages of  $IL-5^{+}$  and  $IL-4^{+}$   $CD4^{+}$  T cells  
142 were measured and analyzed (n=4). **(E)** Splenocytes from the mice in (A) were re-stimulated  
143 with OVA (200  $\mu$ g/ml) and IL-2 (10 ng/ml) for 3 days, and stimulated with P/I. The  
144 percentages of cytokine-producing  $CD4^{+}$  T cells were measured by FACS. **(F)** Cell subtypes  
145 in BAL of the CD45.1 recipient mice as in Fig. 7C were counted and summarized (n=4). **(G)**  
146 Splenocytes from the CD45.1<sup>+</sup> recipient mice as in (D) were used to detect donor cells  
147 ( $CD45.2^{+}$ ) and host cells ( $CD45.1^{+}$ ) gated on  $CD3^{+}CD4^{+}$  and  $CD3^{+}CD4^{-}$  cells. \*:  $p < 0.05$ , \*\*:  $p < 0.01$ , \*\*\*:  $p < 0.001$ .

149

**Primer sequences**

| Gene symbol | Forward primer (5'---3')   | Reverse primer (5'—3')      |
|-------------|----------------------------|-----------------------------|
| mIrf4       | 5'-GCAGCCTTCAGGGCTCGTCG    | 5'-GCAGCCTTCAGGGCTCGTCG     |
| mIlf4       | 5'-GGTCTCAACCCCCAGCTAGT    | 5'-GCCGATGATCTCTCTCAAGTGAT  |
| mIlf5       | 5'-CTCTGTTGACAAGCAATGAGACG | 5'-TCTTCAGTATGTCTAGCCCCT    |
| mIlf13      | 5'-CCTGGCTCTTGCTTGCT       | 5'-GGTCTTGTGTGATGTTGCTCA    |
| mIlfng      | 5'-ATGAACGCTACACACTGCATC   | 5'-CCATCCTTTTGCCAGTTCCTC    |
| mIlf17a     | 5'-CTCCAGAAGGCCCTCAGACTAC  | 5'-GGGTCTTCATTGCGGTGG       |
| mTgf-b      | 5'-TAAGAGGTCACCCGCGTGCT    | 5'-AAAGACAGCCACTCAGGCGTA    |
| mCcl24      | 5'-ATTCTGTGACCATCCCCTCAT   | 5'-TGTATGTGCCTCTGAACCCAC    |
| mMuc5ac     | 5'-CTCCTCTCGGTGACAGAGTCT   | 5'-GTGGTTTGACACTGACTTCCC    |
| mGob5       | 5'-CGTGGTCATTGGCGATGACG    | 5'-CTGTCTTCCTCTTGATCCTCCA   |
| mSocs3      | 5'-ATGGTCACCCACAGCAAGTTT   | 5'-TCCAGTAGAATCCGCTCTCCT    |
| mGfi        | 5'-GATGAGCTTTGCACACTGGA    | 5'-AGGAACGCAGCTTTGACTGT     |
| mRorc       | 5'-AAGATCTGCAGCTTTTCCACA   | 5'-TTTGGAAGTGGCTTTCCATC     |
| mGata3      | 5'-CTCGGCCATTTCGTACATGGAA  | 5'-GGATACCTCTGCACCGTAGC     |
| mStat6      | 5'-CTCTGTGGGGCCTAATTTCCA   | 5'-CATCTGAACCGACCAGGAACT    |
| mTbx21,     | 5'-TTTCCAAGAGACCCAGTTCATTG | 5'-ATGCGTACATGGACTCAAAGTT   |
| mFoxp3      | 5'-CCCATCCCAGGAGTCTTG      | 5'-ACCATGACTAGGGGCACTGTA    |
| mIcosl      | 5'-TAAAGTGTCCCTGTTTTGTGTCC | 5'-ATTGCACCGACTTCAGTCTCT    |
| mCd40       | 5'-TGTCATCTGTGAAAAGGTGGTC  | 5'-ACTGGAGCAGCGGTGTTATG     |
| mOx40l      | 5'-GGGATGCTTCTGTGCTTCATCT  | 5'-TGTTCTGCACCTCCATAGTTTGA  |
| mCcr3       | 5'-TCAACTTGGCAATTTCTGACCT  | 5'-CAGCATGGACGATAGCCAGG     |
| mCxcr4      | 5'-AGCTAAGCAGCATGAACAAC    | 5'-AACGCTGCTGTAGAGGTTGACACT |
| mCcl5       | 5'-TCGTGCCACGTCAAGGAGTA    | 5'-TAGAGCAAGCAATGACAGGGA    |
| mJag1       | 5'-CCTCGGGTCAGTTTGAGCTG    | 5'-CCTTGAGGCACACTTTGAAGTA   |
| mJag2       | 5'-CAATGACACCACTCCAGATGAG  | 5'-GGCCAAAGAAGTCGTTGCG      |
| mDl1        | 5'-CAGGACCTTCTTTTCGCGTATG  | 5'-AAGGGGAATCGGATGGGGTT     |
| mDl3        | 5'-CTGGTGTCTTCGAGCTACAAAT  | 5'-TGCTCCGTATAGACCGGGAC     |

|          |                           |                           |
|----------|---------------------------|---------------------------|
| mDl14    | 5'-TTCCAGGCAACCTTCTCCGA   | 5'-ACTGCCGCTATTCTTGTCCC   |
| mGapdh   | 5'-AACTTTGGCATTGTGGAAGG   | 5'-ACACATTGGGGGTAGGAACA   |
| hGata3   | 5'-GCCCCTCATTAAGCCCAAG    | 5'-TTGTGGTGGTCTGACAGTTCG  |
| hZc3h12a | 5'-GGCAGTGGTTTCTTACGAAGGA | 5'-CCCATCACAGACCAGCACAT   |
| hIl13    | 5'-CCTCATGGCGCTTTTGTGAC   | 5'-TCTGGTTCTGGGTGATGTTGA  |
| pLA-up   | 5'-ATGCCTTCCTGATCCTATTGG  |                           |
| pLA-low  |                           | 5'-CTTTCATGAGCAATGGTCGCA  |
| pLaz-low |                           | 5'-GTGCGGGCCTCTTCGCTATTAC |

152

153

**Antibody list**

| <b>Antibody</b>           | <b>clone</b> | <b>Company</b> |
|---------------------------|--------------|----------------|
| anti-CD3-APC              | 145-2C11     | BD Biosciences |
| anti-CD4-PE               | H129.19      | BD Biosciences |
| anti-CD8-PE               | 53-6.7       | BD Biosciences |
| anti-CD4-PerCP            | RM4-5        | BD Biosciences |
| anti-CD62L-PE             | MEL-14       | BD Biosciences |
| anti-CD44-APC-cy7         | IM7          | BD Biosciences |
| anti-CD44-FITC            | IM7          | BD Biosciences |
| anti-CD11b-FITC           | M1/70        | BD Biosciences |
| anti-CD45.1-AF700         | A20          | BD Biosciences |
| Anti-CD45-pecy7           | 104          | BD Biosciences |
| anti-Ly6G-APC             | 1A8          | BD Biosciences |
| anti-Siglec F-PE          | E50-2440     | BD Biosciences |
| Siglec F-PE               | E50-2440     | BD Biosciences |
| anti-IFN- $\gamma$ -APC   | XMG1.2       | BD Biosciences |
| anti-IL-17A-PE            | TC11-18H10.1 | BD Biosciences |
| anti-IL-17A-AF488         | TC11-18H10.1 | BD Biosciences |
| anti-IL4-AF488            | 11B11        | BD Biosciences |
| anti-IFN- $\gamma$ -AF700 | XMG1.2       | BD Biosciences |
| anti-IL-5-APC             | TRFK5        | BD Biosciences |
| anti-Gata3-PE             | C50-823      | BD Biosciences |
| anti-IL-13-PercPeF710     | eBio13A      | eBioscience    |
| anti-CD11b-FITC           | M1/70        | Biolegend      |
| anti-CD45-PE-Cy7          | N418         | Biolegend      |



Figure E1.

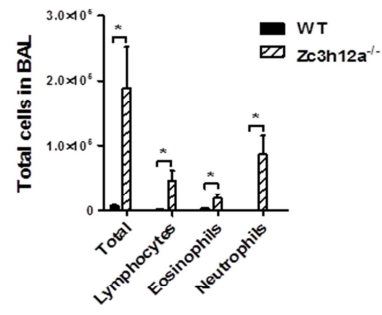

Figure E2.

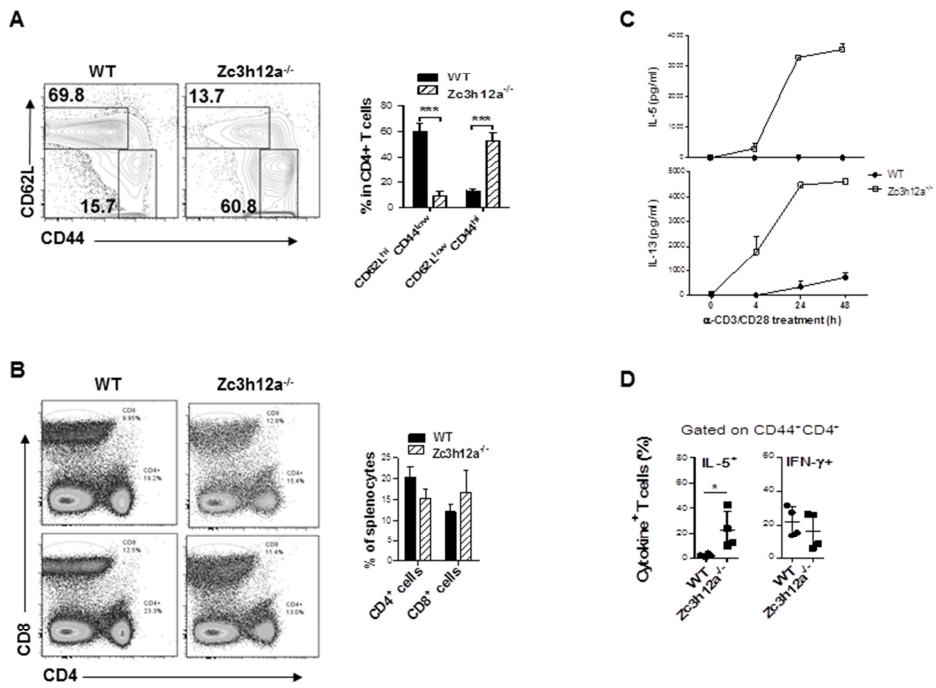

Figure E3.

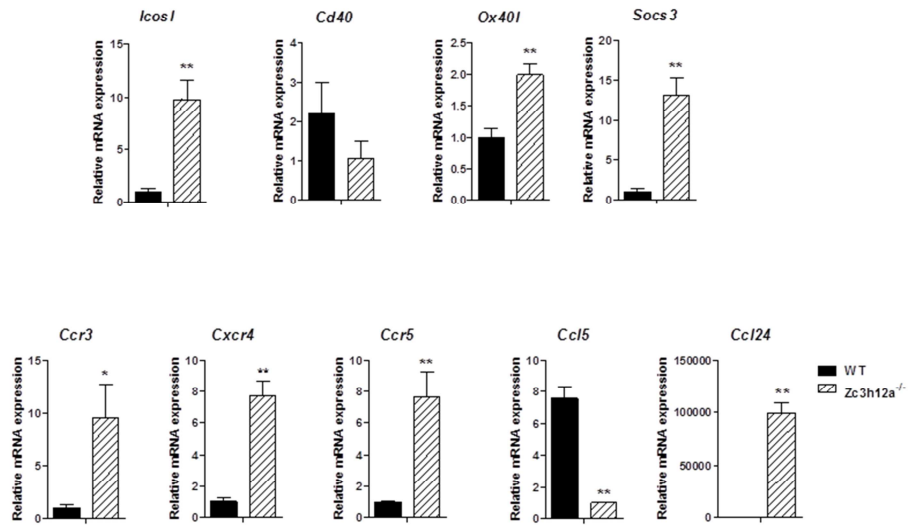

Figure E4.

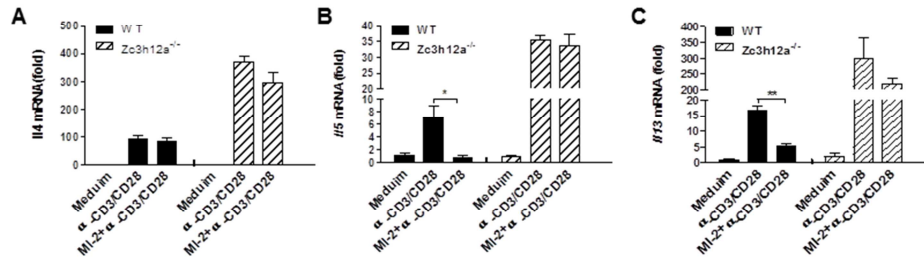

Figure E5.

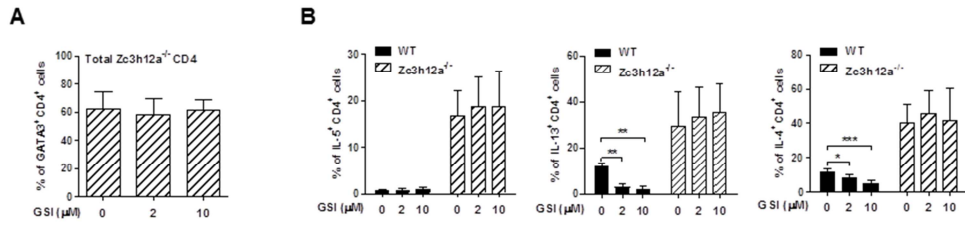

Figure E6.

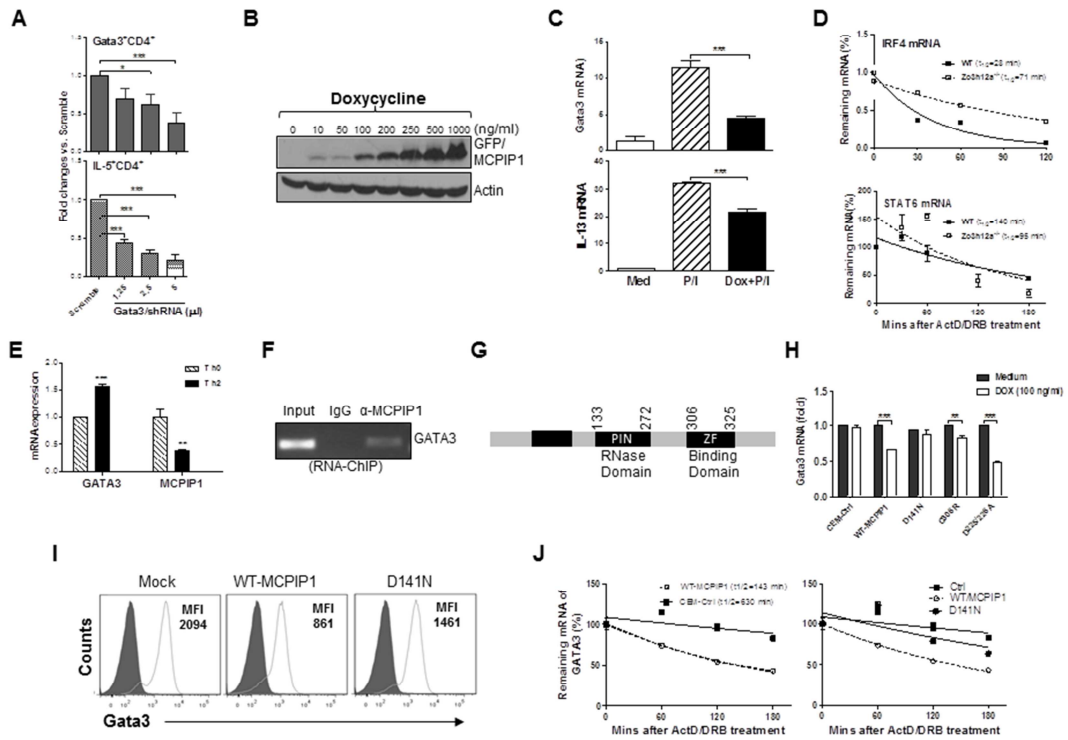

Figure E7.

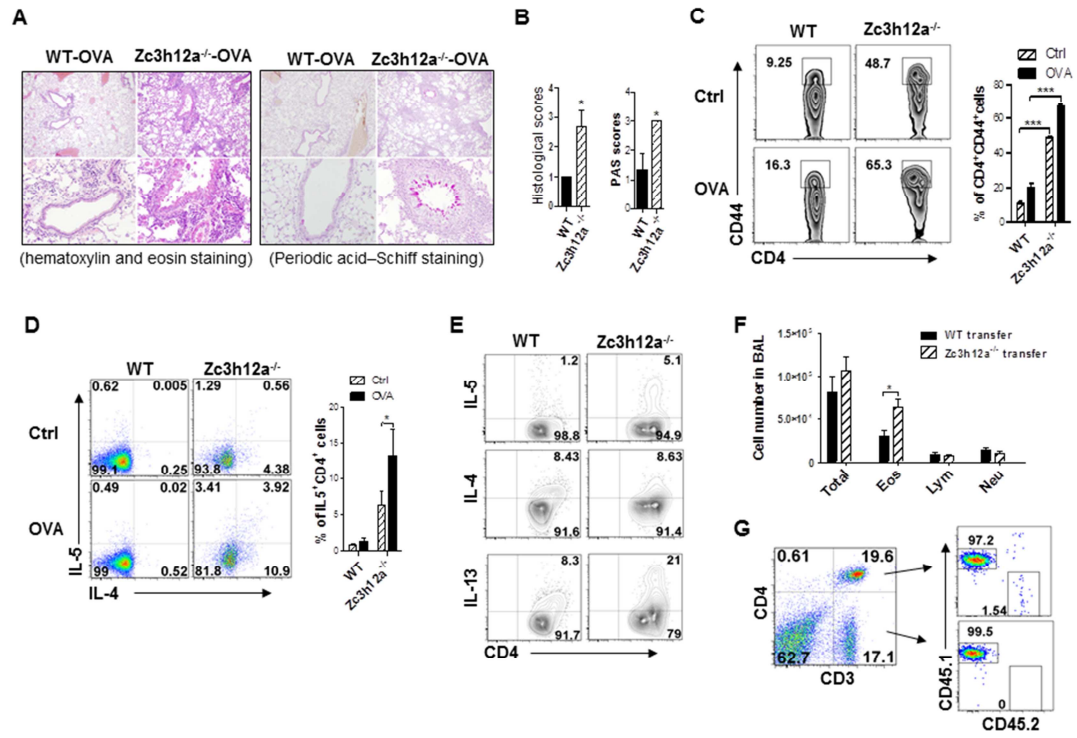

Supplement: NIHMS917477-supplement-supplement_1.pdf [file NIHMS917477-supplement-supplement_1.pdf]
